## REVIEW

# The role of $\gamma\delta$ T cells in flavivirus infections: Insights into immune defense and therapeutic opportunities

Qi Li<sup>1,2,3</sup>, Meng Zhang<sup>4</sup>, Bridget Kim<sup>5</sup>, Samuel Soriano<sup>5</sup>, Hridayesh Mishra<sup>5</sup>, Qiuyue Wang<sup>3</sup>, Kevin C. Kain<sup>5,6,7,8</sup>, Ran Wang<sup>1,2,5,8\*</sup>

**1** Laboratory of Infection and Virology, Beijing Pediatric Research Institute, Beijing Children's Hospital, Capital Medical University, National Center for Children's Health, Beijing, China, **2** Research Unit of Critical Infection in Children, 2019RU016, Chinese Academy of Medical Sciences, Beijing, China, **3** Department of Endocrinology, The First Affiliated Hospital of China Medical University, Shenyang, Liaoning, China, **4** Department of Pediatric Rehabilitation, Beijing Boai Hospital, School of Rehabilitation Medicine, Capital Medical University, China Rehabilitation Research Center, Beijing, China, **5** Sandra A. Rotman (SAR) Laboratories, Sandra Rotman Centre for Global Health, University Health Network-Toronto General Hospital, Toronto, Ontario, Canada, **6** Tropical Disease Unit, Division of Infectious Diseases, Department of Medicine, University of Toronto, Toronto, Ontario, Canada, **7** Department of Experimental Therapeutics, University Health Network-Toronto General Hospital, Toronto, Ontario, Canada, **8** Faculty of Medicine, University of Toronto, Toronto, Ontario, Canada

\* These authors contributed equally to this work.

\* [randall@mail.ccmu.edu.cn](mailto:randall@mail.ccmu.edu.cn)

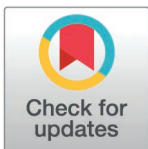

## OPEN ACCESS

**Citation:** Li Q, Zhang M, Kim B, Soriano S, Mishra H, Wang Q, et al. (2025) The role of  $\gamma\delta$  T cells in flavivirus infections: Insights into immune defense and therapeutic opportunities. *PLoS Negl Trop Dis* 19(4): e0012972. <https://doi.org/10.1371/journal.pntd.0012972>

**Editor:** Daniela Weiskopf, La Jolla Institute for Immunology, UNITED STATES OF AMERICA

**Published:** April 17, 2025

**Copyright:** © 2025 Li et al. This is an open access article distributed under the terms of the [Creative Commons Attribution License](https://creativecommons.org/licenses/by/4.0/), which permits unrestricted use, distribution, and reproduction in any medium, provided the original author and source are credited.

**Funding:** This work was supported by Beijing Natural Science Foundation (No. 7222059 to RW), the National Natural Science Foundation of China (No. 82002130 to RW), Beijing Hospitals Authority Innovation Studio of Young Staff Funding (No. 202328 to RW), and BCH Young Investigator Program (BCHYIP to RW). The funders had no role in study design, data collection and analysis, decision to publish, or preparation of the manuscript.

**Competing interests:** The authors have declared that no competing interests exist.

## Abstract

$\gamma\delta$  T cells are a unique subset of unconventional T cells and an important component of the innate immune system. Unlike conventional  $\alpha\beta$  T cells,  $\gamma\delta$  T cells can respond rapidly during the early stages of infection, and their antigen recognition is not restricted by MHC molecules. These distinctive features underscore the important role of  $\gamma\delta$  T cells in viral clearance and infection control. Therefore,  $\gamma\delta$  T cell-based immunotherapies have been extensively explored for the treatment of a variety of diseases, including viral infections and cancers. Several therapeutic strategies based on  $\gamma\delta$  T cells have advanced to clinical trials, demonstrating promising safety and efficacy. Currently, there are no effective treatments for flavivirus infections, which are typically characterized by acute onset. Research has shown that  $\gamma\delta$  T cells can rapidly expand during the early phases of flavivirus infections and effectively suppress viral replication, making them an attractive target for the development of novel therapies for flavivirus infections. This review aims to highlight the immunological roles of  $\gamma\delta$  T cells in flavivirus infections and to explore the potential of  $\gamma\delta$  T cell-based therapeutic strategies for the prevention and treatment of these infections.

## Background

Mosquito-borne flaviviruses belong to the genus *Orthoflavivirus* of the family *Flaviviridae*, which are enveloped, single-stranded positive-sense RNA viruses. They are primarily transmitted by various mosquito species such as *Aedes* and *Culex*. Key members of this genus include Dengue virus (DENV), Zika virus (ZIKV), West Nile virus (WNV), Yellow fever virus (YFV), and Japanese encephalitis virus (JEV) [1]. Each year, these key mosquito-borne

flaviviruses infect approximately 300 million people, with 100 million cases manifesting clinically. This poses a significant threat to nearly half of the world's population and results in a substantial global disease burden [2,3]. While most infections are asymptomatic, symptomatic individuals typically present with nonspecific symptoms such as fever and rash. However, some patients may develop severe, life-threatening complications including hemorrhagic syndrome and encephalitis [4]. Due to the acute onset of flavivirus infections, adaptive immune responses are limited and the role of the innate immune response is essential to control infection.

$\gamma\delta$  T cells, a crucial component of the innate immune system, are characterized by recognizing target cells in a non-MHC-restricted manner [5]. These cells exhibit antiviral capabilities through direct and indirect antiviral functions [6,7]. Therefore, there is a growing interest in  $\gamma\delta$  T cell-based therapeutic strategies for viral infections [7]. For example,  $\gamma\delta$  T cell specific activator amino-bisphosphonate, which has been approved for the treatment of osteoporosis and Paget's disease, was shown to improve the outcomes in influenza virus-infected mice through selectively activating  $\gamma\delta$  T cells [8]. Moreover,  $\gamma\delta$  T cell-based immunotherapies have been applied in clinical cancer treatment, achieving efficacy and showing a promising application future [9]. Given the current lack of effective treatments for flavivirus infections and prospect of  $\gamma\delta$  T cells [10], this review summarizes the research on  $\gamma\delta$  T cells in flavivirus infections, providing a comprehensive understanding of their role and discussing the potential of  $\gamma\delta$  T cell-based therapies.

## $\gamma\delta$ T cells

Human  $\gamma\delta$  T cells constitute approximately 1-10% of total T cells in peripheral blood, and  $\gamma\delta$  T cells are also enriched in various peripheral tissues, such as the skin and intestines, where they promote tissue homeostasis [11]. Similar to  $\alpha\beta$  T cells,  $\gamma\delta$  T cells undergo DNA rearrangement in their receptor genes (*TRD* and *TRG*). *TRD* genes include 3 specific *TRDV* genes (*V $\delta$ 1*, *V $\delta$ 2*, *V $\delta$ 3*), which are most frequently utilized among the eight *V $\delta$*  variants and thus are used in the classification of  $\gamma\delta$  T cell subtypes [11].

## *V $\delta$ 2* T cells

*V $\delta$ 2* T cells are the predominant subset in peripheral blood, comprising approximately 60%–95% of  $\gamma\delta$  T cells. During rearrangement, the *V $\delta$ 2* chain almost exclusively pairs with the *V $\gamma$ 9* chain, resulting in *V $\gamma$ 9V $\delta$ 2* T cells being the most prevalent  $\gamma\delta$  T cell subset in peripheral blood [5]. As an MHC-unrestricted immune cell,  $\gamma\delta$  T cells have recently been shown to utilize a non-restricted recognition mechanism that is associated with *V $\gamma$ 9*. Phosphoantigens (pAgs), which accumulate in infected cells, do not directly interact with *V $\gamma$ 9V $\delta$ 2* T cells but instead function as “molecular glues,” promoting intracellular interactions between butyrophilin subfamily 3 member A1 (BTN3A1) and BTN2A1 within the target cells. This interaction enables the extracellular domain of BTN2A1 to bind to TCR *V $\gamma$ 9* chain, thereby activating  $\gamma\delta$  T cells [12]. Therefore, the use of pAgs or BTN monoclonal antibodies can specifically activate *V $\gamma$ 9V $\delta$ 2* T cells.

Besides *V $\gamma$ 9V $\delta$ 2* TCR-dependent recognition pattern, *V $\delta$ 2* T cells can recognize virus-infected cells through the upregulation of natural killer group 2 member D (NKG2D) ligands, such as MICA, MICB, and ULBP, on the surface of infected cells via NKG2D and induce target cell apoptosis through the Fas-Fas ligand (Fas-FasL) and TNF-related apoptosis-inducing ligand-death receptor 5 (TRAIL-DR5) death pathways [13]. Moreover, *V $\delta$ 2* T cells can also express Fc gamma receptor III (CD16) and enhance their antiviral activity through antibody-dependent cellular cytotoxicity [14].

### V $\delta$ 1 T cells

V $\delta$ 1 T cells are less abundant in peripheral blood, but they are widely distributed in peripheral tissues such as intestinal epithelium, skin, liver, and spleen, contributing to tissue homeostasis [11]. In contrast to V $\delta$ 2 T cells, V $\delta$ 1 T cells do not pair with a specific V $\gamma$  chain, nor do they pair with V $\gamma$ 9, and thus cannot be activated by pAgs [15]. Several MHC-like proteins (presenting lipids or metabolites), such as members of the CD1 family and the MHC class I-related molecule (MR1), have been shown to serve as ligands for V $\delta$ 1 T cells [16]. Interestingly, V $\delta$ 1 T cells can also recognize target cells through their TCR by interacting with the MHC II complex HLA-DR, thus broadening the scope of MHC-restricted recognition by V $\delta$ 1 T cells [6]. Like V $\delta$ 2 T cells, V $\delta$ 1 T cells are capable of recognizing target cells via the NKG2D pathway, while other molecules, such as NKR and DNAM-1, further enhance their cytotoxic activity [15,17]. These diverse recognition mechanisms confer enhanced immune effector functions.

### V $\delta$ 3 T cells

V $\delta$ 3 T cells are almost undetectable in the peripheral blood of healthy individuals but showed increased levels in the peripheral blood of patients with reactivated human cytomegalovirus [18]. V $\delta$ 3 T cells are predominantly located in the intestine and lamina propria [11]. They exhibit functional similarities to V $\delta$ 1 T cells, as MR1 and CD1d have also been shown to bind to V $\gamma$ 8V $\delta$ 3 T cells [19,20]. However, Annexin A2, which is upregulated on tumor cells, has been found to specifically stimulate the proliferation of V $\gamma$ 8V $\delta$ 3 T cells [21]. Nevertheless, research on V $\delta$ 3 T cells remains very limited.

In mice,  $\gamma\delta$  T cells are categorized into seven subgroups (V $\gamma$ 1-7) based on *TRGV* genes and mouse  $\gamma\delta$  T cells lack similar V $\gamma$ 9 chain, rendering them incapable of activation by pAgs [22]. Moreover, there are also differences in tissue distribution between mouse  $\gamma\delta$  T cells and human  $\gamma\delta$  T cells [23]. For example, mouse epidermal T cells consist exclusively of V $\gamma$ 5<sup>+</sup> dendritic epidermal T cells, whereas the human epidermis contains both  $\alpha\beta$  T cells and  $\gamma\delta$  T cells, with V $\delta$ 1 T cells present in both the epidermis and dermis [23]. Although there are differences in TCR composition and tissue specificity, mouse  $\gamma\delta$  T cells exhibit similar functional characteristics with human  $\gamma\delta$  T cells. For instance, CD1d serves as a ligand for V $\delta$ 1 T cells in both mice and humans [24]. Moreover, human and mouse epidermal  $\gamma\delta$  T cells can both produce keratinocyte growth factor and insulin-like growth factor 1, promoting wound healing [22]. Therefore, data from mouse models can provide valuable insights into understanding the role of  $\gamma\delta$  T cells in human.

## $\gamma\delta$ T cells in flavivirus infections

Human infection with flaviviruses typically occurs through the bite of infected mosquitoes, which inject the virus into skin. The virus then spreads through the blood or lymphatic system to target organs for replication. This section will demonstrate the characteristics of  $\gamma\delta$  T cells from the process of flavivirus infections.

### The activation and amount of $\gamma\delta$ T cells

Following a mosquito bite, the skin is the initial site of flavivirus infections where tissue-resident  $\gamma\delta$  T cells are first activated. To mimic the natural infection route via skin bites, researchers infected C57BL/6 mice with DENV using footpad injections [25]. They reported that a significant expansion of  $\gamma\delta$  T cells was observed at the initial infection site (footpad) and in draining lymph nodes (DLNs) of the footpad, as early as 1 day post-infection. Moreover,  $\gamma\delta$  T cells were the most abundant T cell subset at footpad [25]. Similarly, in C57BL/6 mice

intraperitoneally injected with WNV, a significant increase in  $\gamma\delta$  T cell numbers was detected in the peritoneal cavity 2 days post-infection, and  $\gamma\delta$  T cells exhibited greater proliferation compared to  $\alpha\beta$  T cells in splenocytes [26]. These findings suggest that during flavivirus infections,  $\gamma\delta$  T cells are the first T cells to respond in the early stage of infection and undergo significant expansion.

Upon entry into the blood, flaviviruses are disseminated to target organs via blood circulation.  $\gamma\delta$  T cells in peripheral blood recognize infected cells and are activated. In peripheral blood mononuclear cells (PBMCs) of patients infected with DENV, the proportion of V $\delta$ 2 T cells decreased; however, the proportion of cells expressing CD38 and HLA-DR (activation markers) remained significantly elevated, indicating that V $\delta$ 2 T cells were still in an activated state during DENV infection [27]. However, in patients with ZIKV infection, there was a significant expansion of the CD3<sup>+</sup> CD4<sup>-</sup> CD8<sup>-</sup> (double negative, DN) T cell subset in PBMCs, which primarily consist of  $\gamma\delta$  T cells (V $\delta$ 1, V $\delta$ 2, V $\delta$ 1<sup>-</sup> V $\delta$ 2<sup>-</sup>) and NKT cells. Flow cytometry analysis revealed that approximately 80% of DN T cells were V $\delta$ 2 T cells, a significantly higher proportion than that in control groups [28]. Moreover, the proportion of V $\delta$ 2 T cells increased markedly in the early stages of symptom onset (2–3 days) and gradually decreased with the progression of the infection. Of note, the study reported that the proportion of V $\delta$ 1<sup>-</sup> V $\delta$ 2<sup>-</sup> DN T cells in PBMCs of ZIKV-infected patients was 15.9%, significantly higher than the proportion of V $\delta$ 1 T cells (3.2%) [28]. In summary, the  $\gamma\delta$  T cell population in PBMCs undergoes significant alterations during the early stage of infection, indicating their potential involvement in the initial immune response to flavivirus infections.

Additionally, ZIKV infection is known to cause congenital Zika syndrome, characterized by fetal microcephaly [29]. One research had shown that following ZIKV infection in pregnant rhesus macaques, there was a significant decrease in the proportion of HLA-DR<sup>+</sup> and Ki67<sup>+</sup> (a proliferation marker)  $\gamma\delta$  T cells in the decidua, which is the maternal-fetal interface rich in immune cells [30]. Similarly, compared to normal pregnant macaques, the proportion of Ki67<sup>+</sup>  $\gamma\delta$  T cells in PBMCs of the infected group also significantly decreased [30]. These findings suggest that ZIKV infection in pregnant macaques may suppress the activation and proliferation of  $\gamma\delta$  T cells in both the decidua and PBMCs. In addition, the immune characteristics of  $\gamma\delta$  T cells in flavivirus infections are presented in [Table 1](#).

**Table 1. Immune characteristics of  $\gamma\delta$  T cells in flavivirus infections. Human  $\gamma\delta$  T cells can primarily be divided into three main subsets: V $\delta$ 1, V $\delta$ 2, and V $\delta$ 3.  $\gamma\delta$  T<sub>EMRA</sub> cells, as effector T cells, can directly kill virus-infected cells, while  $\gamma\delta$  T<sub>EM</sub> cells, as central memory cells, often secrete cytokines such as IFN- $\gamma$  to exert indirect antiviral effects.**

| Viruses | Samples                                            | Proportion                                                                                      | Phenotype                                                                                                                                                         | References |
|---------|----------------------------------------------------|-------------------------------------------------------------------------------------------------|-------------------------------------------------------------------------------------------------------------------------------------------------------------------|------------|
| DENV    | PBMCs from patients                                | V $\delta$ 2 T $\downarrow$                                                                     | $\gamma\delta$ T <sub>EMRA</sub> $\uparrow$<br>$\gamma\delta$ T <sub>EM</sub> $\downarrow$                                                                        | [27]       |
|         | Cells in footpad and draining lymph node from mice | $\gamma\delta$ T $\uparrow$                                                                     |                                                                                                                                                                   | [25]       |
| ZIKV    | PBMCs from patients                                | V $\delta$ 2 T $\uparrow$ ,<br>V $\delta$ 1 <sup>-</sup> V $\delta$ 2 <sup>-</sup> T $\uparrow$ | $\gamma\delta$ T <sub>EMRA</sub> $\uparrow$ , $\gamma\delta$ T <sub>EM</sub> $\downarrow$                                                                         | [28]       |
|         | PBMCs and placenta from pregnant monkeys           | $\gamma\delta$ T $\downarrow$                                                                   | In PBMCs, $\gamma\delta$ T <sub>EMRA</sub> $\uparrow$ , $\gamma\delta$ T <sub>EM</sub> $\downarrow$<br>In placenta, $\gamma\delta$ T <sub>EMRA</sub> $\downarrow$ | [29]       |
| WNV     | Spleen and peritoneal cells from mice              | $\gamma\delta$ T $\uparrow$                                                                     |                                                                                                                                                                   | [26]       |

DENV, dengue virus; ZIKV, Zika virus; WNV, West Nile virus; PBMCs: peripheral blood mononuclear cells; IFN- $\gamma$ , interferon- $\gamma$ .

<https://doi.org/10.1371/journal.pntd.0012972.t001>

## The cellular phenotype of $\gamma\delta$ T cells

Similar to  $\alpha\beta$  T cells,  $\gamma\delta$  T cells can also be categorized into four subsets based on cellular phenotypes: naïve ( $\gamma\delta T_N$ ), central memory ( $\gamma\delta T_{CM}$ ), effector memory ( $\gamma\delta T_{EM}$ ), and terminally differentiated effector cells ( $\gamma\delta T_{EMRA}$ ). Indeed, the differentiation phenotype of  $\gamma\delta$  T cells is closely associated with their functional phenotype.  $\gamma\delta T_{EM}$  and  $\gamma\delta T_{EMRA}$ , as major effector cells, exhibit distinct functions:  $\gamma\delta T_{EM}$  typically secretes Th1-type cytokines such as IFN- $\gamma$  and TNF- $\alpha$ , while  $\gamma\delta T_{EMRA}$  primarily engages in cytotoxic activity against target cells through the secretion of perforin, granzyme B, and NK cell receptors-mediated mechanisms [14].

In PBMCs of patients infected with DENV and ZIKV, there was a notable increase in the proportion of granzyme B<sup>+</sup>  $\gamma\delta$  T cells (corresponding to  $\gamma\delta T_{EMRA}$  cells), while the proportion of IFN- $\gamma$ <sup>+</sup>  $\gamma\delta$  T ( $\gamma\delta T_{EM}$ ) cells showed a declining trend [27,28]. Of note, it can be observed that the expression levels of TIM-3 were significantly negatively correlated with the proportion of IFN- $\gamma$ <sup>+</sup>  $\gamma\delta$  T cells in dengue patients, suggesting that TIM-3 may negatively regulate the secretion of IFN- $\gamma$  [27]. Similarly, comparable changes were observed in PBMCs of pregnant monkeys infected with ZIKV, with an increase in the proportion of  $\gamma\delta T_{EMRA}$  cells and a decrease in the proportion of  $\gamma\delta T_{EM}$  cells [30]. However, in the decidua of pregnant macaques infected with ZIKV, there was a significant decrease in the proportion of granzyme B<sup>+</sup>  $\gamma\delta$  T ( $\gamma\delta T_{EMRA}$ ) cells compared to normal pregnant monkeys, indicating an impairment in the protective function of  $\gamma\delta$  T cells [30]. Taken together, enhancing the function of  $\gamma\delta$  T cells holds potential to benefit patients by augmenting their immune response.

In addition to the functions mentioned above,  $\gamma\delta$  T cells can also secrete IL-17A. In C57BL/6 mice infected with DENV,  $\gamma\delta$  T cells underwent significant expansion by day 4 post-infection and were the major producers of IL-17A in the spleen, which is negatively regulated by IL-22 [31]. Similarly, in *IFNAR*<sup>-/-</sup> mice (interferon- $\alpha$  receptor deficiency) infected with ZIKV,  $\gamma\delta$  T cells were the predominant immune cells secreting IL-17A in splenic cells and brain tissues. The quantity of IL-17A-producing  $\gamma\delta$  T cells began to increase by day 3 post-infection and peaks by day 5 post-infection [32]. Compared to IFN- $\gamma$ <sup>+</sup>  $\gamma\delta$  T cells in peripheral blood, IL-17A<sup>+</sup>  $\gamma\delta$  T cells predominantly accumulate in peripheral tissues, with their peak proliferation occurring at a later stage. As an inflammatory regulator, IL-17A activates various immune cells, thereby amplifying the immune response in the early stage. However, it is important to note that prolonged secretion of IL-17A may exacerbate tissue damage [33,34].

## The protective role of $\gamma\delta$ T cells

$\gamma\delta$  T cells provide protective immunity against flavivirus infections in mice, including enhanced survival rates, promotion of adaptive immunity, decreased viral loads, and amelioration of pathological injury to target organs. Firstly,  $\gamma\delta$  T cells enhance survival rates post-infection. In mouse models infected with lethal doses of WNV in wild-type (WT) mice and  $\gamma\delta$  T cell-deficient (*TCR $\delta$* <sup>-/-</sup>) mice, it was observed that *TCR $\delta$* <sup>-/-</sup> mice experienced earlier and more rapid mortality compared to WT mice. When infected with sublethal doses of WNV, all *TCR $\delta$* <sup>-/-</sup> mice succumbed to infection, whereas 75% of WT mice survived [26]. Secondly,  $\gamma\delta$  T cells can play a role in the promotion of adaptive immunity. After 30 days post-initial infection, re-infection with a lethal dose of WNV in mice that survived initial infection revealed nearly complete survival in WT group, whereas mice in *TCR $\delta$* <sup>-/-</sup> group exhibited significantly reduced survival rates [35]. Thirdly,  $\gamma\delta$  T cells participate in the process of viral clearance. Compared to WT mice, *TCR $\delta$* <sup>-/-</sup> mice infected with WNV exhibited significantly higher viral loads in blood and brain tissues (target organs for WNV infection) on days 2 (early phase) and 6 (late phase) post-infection [26]. Similarly, in *TCR $\delta$* <sup>-/-</sup> mice infected with DENV, viral

loads in the infection site (footpad) and DLNs were significantly higher than those in control groups [25]. Finally,  $\gamma\delta$  T cells may modulate the pathobiology of target tissues. In WNV-infected mice, brain tissues showed no inflammatory cells infiltration in WT mice on day 2 post-infection, whereas *TCR $\delta$ <sup>-/-</sup>* mice exhibited mononuclear inflammatory cell infiltration, particularly in the ventricular walls near the basal ganglia. By day 6 post-infection, WT mice still showed minimal inflammatory cell infiltration in brain tissues, whereas *TCR $\delta$ <sup>-/-</sup>* mice exhibited exacerbated inflammatory cell infiltration [26].

Additionally, an intriguing observation of two  $\gamma\delta$  T cell subsets ( $V\gamma 1^+$  T cells and  $V\gamma 4^+$  T cells) was made in WNV-infected mice of different ages: By day 3 post-infection,  $V\gamma 1^+$  T cells in splenic cells of young mice rapidly expanded and represented the major subset of  $\gamma\delta$  T cells producing IFN- $\gamma$ , while  $V\gamma 4^+$  T cell expansion was less pronounced. Conversely, aged mice showed decreased proportions and proliferation rates of  $V\gamma 1^+$  T cells and higher proportions of  $V\gamma 4^+$  T cells compared to young mice [36]. Depletion of  $V\gamma 1^+$  T cells in young mice significantly increased viral loads in the brain and mortality rates, whereas depletion of  $V\gamma 4^+$  T cells resulted in significantly reduced viral loads in the brain and improved survival rates. Moreover,  $V\gamma 4^+$  T cells exhibited a greater ability to produce TNF- $\alpha$ , a cytokine known to contribute to blood-brain barrier compromise and facilitate WNV entry into the brain [36]. These findings indicate that  $V\gamma 1^+$  T cells play a protective role, whereas  $V\gamma 4^+$  T cells have the opposite effect.

## The protective mechanism of $\gamma\delta$ T cells

As described above,  $\gamma\delta$  T cells play an important protective role in flavivirus infections. The protective mechanisms (Table 2) involved are as follows:

### The activation signaling

$\gamma\delta$  T cells can be activated through mechanical contact of their TCR with endothelial protein C receptor (EPCR) on mast cells during DENV infection. In Sash mice lacking mast cells, three days post-DENV infection, the number of  $\gamma\delta$  T cells at the infection site and in DLNs significantly decreased compared to the control group, accompanied by a marked reduction in IFN- $\gamma$  secretion. This indicates a strong dependency of  $\gamma\delta$  T cell activation on mast cells [25]. Further experiments revealed that only mast cells exposed to DENV can activate  $\gamma\delta$  T cells, which subsequently kill DENV-infected dendritic cells (DCs), but spare mast cells. This suggests that mast cells may activate  $\gamma\delta$  T cells through a process akin to antigen presentation. Moreover, inhibition of TCR signaling in  $\gamma\delta$  T cells does not block their activation by mast

**Table 2. The mechanisms of  $\gamma\delta$  T cells function in flavivirus infections. After flavivirus infection,  $\gamma\delta$  T cells can be activated through various recognition mechanisms of the  $\gamma\delta$  TCR and TLR signaling pathways. Subsequently, they secrete cytokines (IFN- $\gamma$ , IL-17A, or TNF- $\alpha$ ), enhancing the systemic immune response. However, we must be cautious, as the prolonged presence of certain cytokines may exacerbate tissue damage. Additionally, they can directly kill virus-infected cells.**

| The activation signaling                                   | The secretion of cytokines                                                                                                                                                                   | The direct killing effect                              |
|------------------------------------------------------------|----------------------------------------------------------------------------------------------------------------------------------------------------------------------------------------------|--------------------------------------------------------|
| 1. Recognition of phosphoantigens [41]                     | 1. IFN- $\gamma$ : (1) Inhibit the proliferation of infected cells [26]. (2) Promote the maturation of DCs and the formation of adaptive immunity [38].                                      | 1. $\gamma\delta$ T cell-mediated cytotoxicity [41,42] |
| 2. Mechanical contact of $\gamma\delta$ TCR with EPCR [25] | 2. IL-17A: (1) Promote the cytotoxic activity of CD8 <sup>+</sup> T cells in WNV [40]. (2) Serum levels of IL-17A are positively correlated with the severity of dengue fever patients [33]. |                                                        |
| 3. TLR7-MyD88 signaling pathway [37]                       | 3. TNF- $\alpha$ : $V\gamma 4^+$ T cells may enhance susceptibility of aged mice to WNV via increased secretion of TNF- $\alpha$ [36].                                                       |                                                        |

EPCR, endothelial protein C receptor; DCs, dendritic cells; TLR7, toll-like receptor 7; MyD88, myeloid differentiation factor 88; IL17-RA, IL-17A receptor; DENV, dengue virus; WNV, West Nile virus; TNF- $\alpha$ , tumor necrosis factor  $\alpha$ .

<https://doi.org/10.1371/journal.pntd.0012972.t002>

cells, implying that mast cells require mechanical contact with  $\gamma\delta$  T cells to enhance their activation. Finally, it was observed that DENV infection increased surface expression of EPCR on mast cells; blocking EPCR with specific antibodies reduced the activation level and number of  $\gamma\delta$  T cells [25] (Fig 1A).

The TLR7-MyD88 signaling pathway has been demonstrated to participate in the activation of  $\gamma\delta$  T cells during WNV infection. *In vitro* treatment of mouse  $\gamma\delta$  T cells with TLR7 agonists showed increased activation, evidenced by significant upregulation of activation marker CD69 and elevated levels of Th1-type cytokines (IFN- $\gamma$  and TNF- $\alpha$ ) in the supernatant (Fig 1B). In *TLR7*<sup>-/-</sup> and *MyD88*<sup>-/-</sup> mice infected with WNV, significant reductions in the proportion of  $\gamma\delta$  T cells were observed on days 3 and 5 post-infection compared to controls [37].

### The secretion of cytokines

$\gamma\delta$  T cells serve as the primary early source of IFN- $\gamma$  during anti-WNV infection. Infection of *IFN- $\gamma$* <sup>-/-</sup> mice with sublethal doses of WNV resulted in nearly all *IFN- $\gamma$* <sup>-/-</sup> mice succumbing (90%), compared to 30% in the control group. Given that both  $\alpha\beta$  T cells and  $\gamma\delta$  T cells can produce IFN- $\gamma$ , researchers further investigated the source of IFN- $\gamma$  by assessing IFN- $\gamma$  secretion among various cell subsets in splenocytes. By day 2 post-WNV infection in WT, *TCR $\beta$* <sup>-/-</sup>, and *TCR $\delta$* <sup>-/-</sup> mice, significant levels of IFN- $\gamma$  were detected in the blood and splenocytes of WT and *TCR $\beta$* <sup>-/-</sup> mice, whereas IFN- $\gamma$  was nearly undetectable in *TCR $\delta$* <sup>-/-</sup> mice [26]. Additionally, the downregulation of IFN- $\gamma$  secretion was observed in DCs from WNV-infected *TCR $\delta$* <sup>-/-</sup> mice compared to WT mice, evidenced by decreased surface activation markers CD40, CD80, CD86, and MHC-II. Moreover, co-culture experiments of DCs harvested from infected mice with CD4<sup>+</sup> T cells showed significantly reduced activation levels of CD4<sup>+</sup> T cells when DCs were derived from *TCR $\delta$* <sup>-/-</sup> mice [38] (Fig 1B).

$\gamma\delta$  T cells may contribute to the regulation of adaptive immunity through the secretion of IL-17A, thereby exerting an indirect antiviral effect against flavivirus infections. As previously mentioned, *TCR $\delta$* <sup>-/-</sup> mice surviving initial WNV infection remained more susceptible to subsequent WNV infections compared to controls. Considering that  $\gamma\delta$  T cells may directly participate in anti-infection responses during secondary infections, researchers depleted  $\gamma\delta$  T cells in surviving WT mice prior to secondary infection. The results indicate that even in the absence of  $\gamma\delta$  T cells, nearly all mice survived, suggesting that  $\gamma\delta$  T cells do not exert a predominant anti-infection effect during secondary WNV infection [35]. Consequently, researchers evaluated the adaptive immunity of *TCR $\delta$* <sup>-/-</sup> and WT mice surviving initial WNV infection, finding no differences in IgM, IgG, and WNV-specific neutralizing antibody titers between the two groups. Subsequently, sera from both groups were transferred to naive mice prior to WNV challenge, and recipients from both groups successfully resisted lethal doses of WNV [35]. In a mouse model infected with JEV, *TCR $\delta$* <sup>-/-</sup> mice also exhibited comparable JEV-specific neutralizing antibody titers to WT mice [39]. These data suggest that  $\gamma\delta$  T cells do not impact the formation of flavivirus-specific neutralizing antibodies.

Therefore, researchers further analyzed the function of CD8<sup>+</sup> T cells, demonstrating that naive mice receiving splenocytes from surviving *TCR $\delta$* <sup>-/-</sup> mice had higher mortality rates compared to those receiving splenocytes from surviving WT mice, indicating a regulatory role of  $\gamma\delta$  T cells in the function of CD8<sup>+</sup> T cells. Further functional analysis revealed that surviving *TCR $\delta$* <sup>-/-</sup> mice exhibited reduced numbers of CD8<sup>+</sup> T cells post-infection compared to WT mice, along with diminished IFN- $\gamma$  secretion and cytotoxic activity [35]. Another study showed that *IL-17A*<sup>-/-</sup> mice infected with WNV displayed significantly reduced cytotoxic activity of CD8<sup>+</sup> T cells and lower expression levels of cytotoxic genes compared to WT mice [40].  $\gamma\delta$  T cells may promote the cytotoxic function of WNV-specific CD8<sup>+</sup> T cells through IL-17A secretion, contributing to WNV clearance, but further research is warranted (Fig 1B).

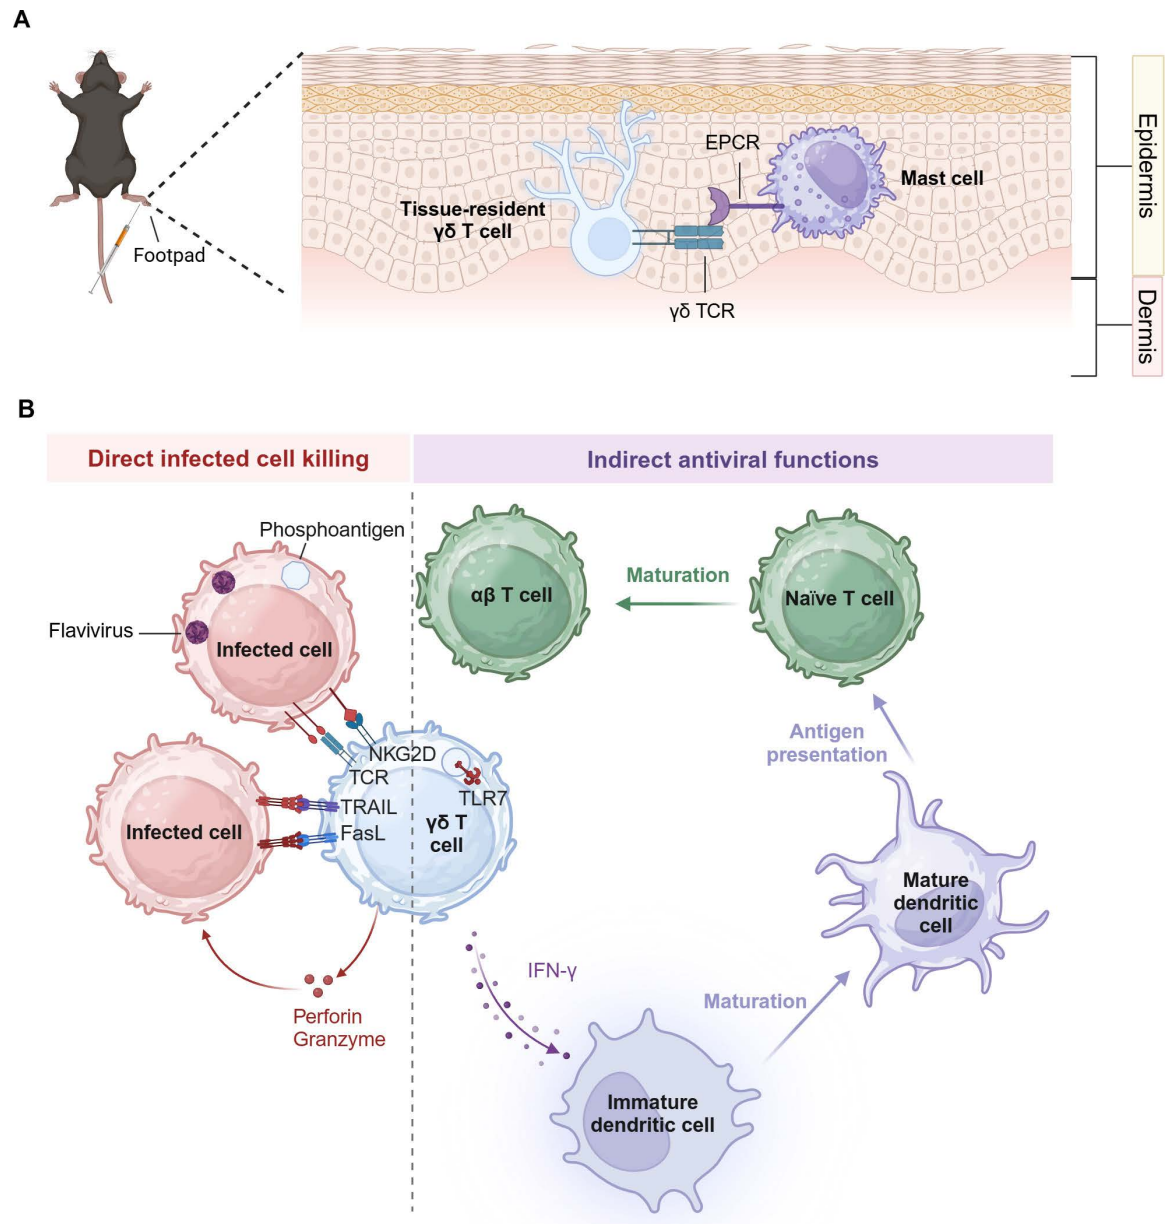

**Fig 1. The protective mechanism of  $\gamma\delta$  T cells in flavivirus infections.** **A.** Mechanical contact between tissue-resident  $\gamma\delta$  TCR and endothelial protein C receptor (EPCR). Following footpad injection of Dengue virus (DENV) in mice, skin-resident  $\gamma\delta$  T cells are the first to be activated. This activation occurs through mechanical interaction between their T cell receptor (TCR) and EPCR, which is upregulated on the surface of DENV-infected mast cells, thereby initiating their protective function. **B.** Protective mechanism of  $\gamma\delta$  T cells in peripheral blood.  $\gamma\delta$  T cell activation is primarily mediated through their TCR, which recognizes BTN proteins on the surface of infected cells. These BTN proteins undergo conformational changes in response to the intracellular accumulation of phosphoantigens, enabling TCR engagement. Furthermore, TLR7, a pattern recognition receptor that detects single-stranded RNA, has also been implicated in  $\gamma\delta$  T cell activation under certain conditions. Upon activation,  $\gamma\delta$  T cells execute their antiviral functions via two distinct mechanisms: direct and indirect pathways. The direct antiviral mechanism involves surface molecules such as NKG2D, TRAIL, and FasL, which detect the upregulation of corresponding ligands on infected cells. This interaction facilitates the targeted release of cytotoxic mediators, including perforin and granzyme B, resulting in the lytic destruction of infected cells. Conversely, the indirect antiviral mechanism is characterized by the secretion of IFN- $\gamma$ , a cytokine that plays a pivotal role in facilitating the adaptive immune response, thereby augmenting viral clearance and immune defense. NKG2D, natural killer group 2 member D; TRAIL, tumor necrosis factor-related apoptosis-inducing ligand; FasL, Fas ligand; Created in BioRender.

<https://doi.org/10.1371/journal.pntd.0012972.g001>

**Table 3.  $\gamma\delta$  T cell-based anti-flaviviral potential therapies. Currently, there are five types of  $\gamma\delta$  T cell-based immunotherapies. These methods primarily utilize the specific recognition and activation mechanisms of  $\gamma\delta$  T cells to enhance their secretion of interferons and their cytotoxic ability against infected cells.**

| Strategies                           | Therapies                                                                                        | Mechanism                                                                                      | References |
|--------------------------------------|--------------------------------------------------------------------------------------------------|------------------------------------------------------------------------------------------------|------------|
| Expanded $\gamma\delta$ T cells      | IPP                                                                                              | Stimulate $\gamma\delta$ T cells proliferation directly                                        | [43]       |
|                                      | ZOL, PAM                                                                                         | Promote the accumulation of phosphoantigens                                                    | [8,41]     |
|                                      | ICT01                                                                                            | Promote the binding of BTN3A1 and BTN2A1                                                       | [44,46]    |
| Bispecific antibody                  | Anti- $\gamma\delta$ TCR and anti-flavivirus antigen                                             | Promote the accumulation and activation of $\gamma\delta$ T cells                              | [54]       |
|                                      | Flavivirus-reactive TCR and anti-CD3 scFV                                                        | Bring more general T cells to infected sites                                                   | [53]       |
| CAR- $\gamma\delta$ T cells          | CAR- $\gamma\delta$ T cells with flavivirus antigen                                              | Kill infected cells more precisely                                                             | [61]       |
|                                      | CAR- $\gamma\delta$ T cells with NKG2D                                                           | Induce more $\gamma\delta$ T cells migration to infection sites                                | [63]       |
| $\gamma\delta$ TCR- T cells          | $\alpha\beta$ T cells with $\gamma\delta$ TCR                                                    | Enhance T cells sensitivity to infected cells                                                  | [65]       |
|                                      | $\alpha\beta$ T cells with $\gamma\delta$ TCR, CD3 and flavivirus antigen-targeting Fab fragment | Promote activation and increase specificity of T cells                                         | [64]       |
| Drug-assisted $\gamma\delta$ T cells | RO7020531                                                                                        | Enhance the cytotoxicity of $\gamma\delta$ T cells via the activation of TLR7                  | [66,67]    |
|                                      | Anti-TIM-3 antibody                                                                              | Promote the secretion of IFN- $\gamma$ via the inhibition of TIM-3                             | [27,68,69] |
|                                      | Vitamin C                                                                                        | Reduce apoptosis of $\gamma\delta$ T cells                                                     | [70,71]    |
|                                      | AHCC                                                                                             | Promote the proliferation of $\gamma\delta$ T cells and increase the production of IgM and IgG | [72]       |

IPP, isopentenyl pyrophosphate; ZOL, zoledronic acid; PAM, pamidronate; ICT01: agonist of BTN3A1; BTN, butyrophilin; scFV, single-chain variable fragment; CAR, chimeric antigen receptor; NKG2D, natural killer group 2 member D; RO7020531: agonist of TLR7; Tim-3, T cell immunoglobulin domain and mucin-domain-3; AHCC, active hexose correlated compound.

<https://doi.org/10.1371/journal.pntd.0012972.t003>

### The direct killing effect

Upon activation,  $\gamma\delta$  T cells can directly lyse target cells infected with flaviviruses. Co-culturing human  $\gamma\delta$  T cells with WNV-infected cells resulted in significantly elevated levels of perforin in the supernatant and pronounced cytopathic effects compared to uninfected cells [41]. Similar observations were made in co-cultures of human  $\gamma\delta$  T cells with ZIKV-infected cells. Further investigation revealed that ZIKV infection upregulated expression of NKG2D ligands on target cells, and that blocking  $\gamma\delta$  T cell-mediated cytotoxicity against target cells can be achieved using NKG2D antibodies [42] (Fig 1B).

### Potential of $\gamma\delta$ T cells-based anti-flaviviral therapies

Based on the aforementioned summary, it can be concluded that  $\gamma\delta$  T cells are the first responders during the early stage of flavivirus infections, providing antiviral defense while also facilitating the development of adaptive immunity. Therefore, in the context of limited treatment options for flavivirus infections,  $\gamma\delta$  T cells may offer a promising avenue for novel

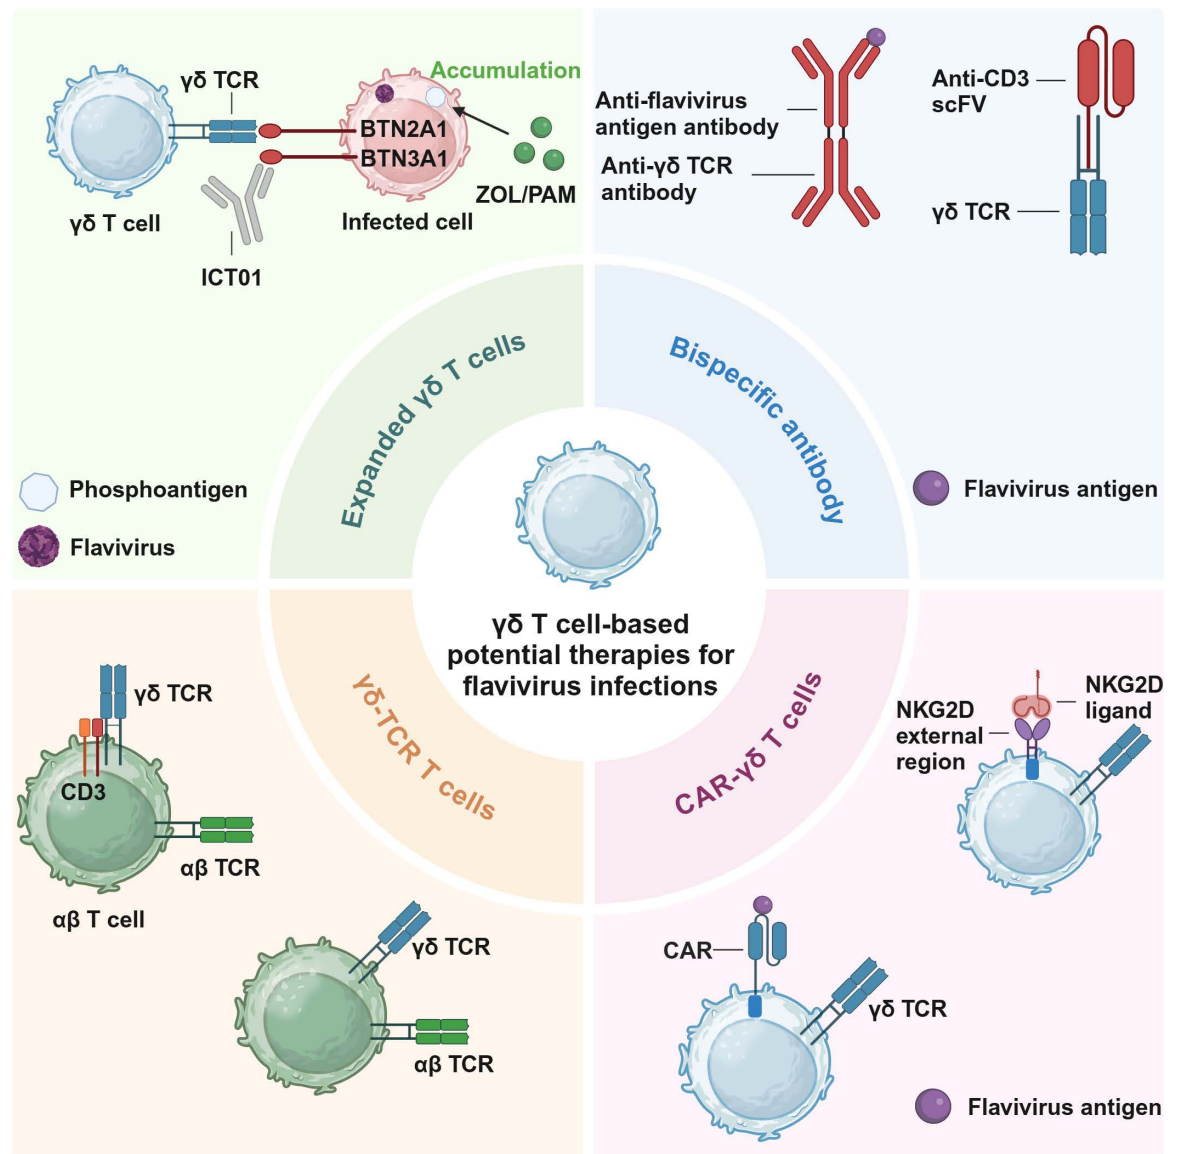

**Fig 2.  $\gamma\delta$  T cell-based potential therapies for flavivirus infections.** Current immunotherapies based on  $\gamma\delta$  T cells primarily include four main strategies. The first strategy involves the use of expanded  $\gamma\delta$  T cells, which is mainly based on the activation mechanism of  $\gamma\delta$  TCR. Zoledronic acid (ZOL) and pamidronate (PAM) can promote the accumulation of phosphoantigens within infected cells, which in turn induces conformational changes in BTN2A1 and BTN3A1, allowing them to interact with  $\gamma\delta$  TCR and activate  $\gamma\delta$  T cells. Additionally, the BTN3A1 activator ICT01 can directly induce conformational changes in BTN3A1, thereby activating  $\gamma\delta$  T cells through a phosphoantigen-independent pathway. The second strategy involves the use of bispecific antibodies, which are designed based on two approaches: the first approach aims to direct  $\gamma\delta$  T cells toward flavivirus-infected cells to enhance their specificity; the second utilizes the recognition properties of  $\gamma\delta$  TCR to target  $\alpha\beta$  T cells to the site of infected cells. The third strategy builds upon  $\gamma\delta$  T cells by introducing artificially engineered chimeric antigen receptors (CARs) designed to target flavivirus antigens or NKG2D ligands specifically upregulated in infected cells, thereby further enhancing the cytotoxic function of  $\gamma\delta$  T cells. The fourth strategy leverages the unique recognition characteristics of  $\gamma\delta$  TCR to modify  $\alpha\beta$  T cells, endowing them with similar recognition capabilities to  $\gamma\delta$  T cells, thereby increasing their ability to kill infected cells. NKG2D, natural killer group 2 member D. Created in BioRender.

<https://doi.org/10.1371/journal.pntd.0012972.g002>

therapeutic strategies. Given the successful application of  $\gamma\delta$  T cell-based immunotherapies in the treatment of other diseases, this section discusses the possibility of applying the currently developed  $\gamma\delta$  T cells therapies to the treatment of flavivirus infections, hoping to give some suggestions for further research in this area (Table 3).

## Expanded $\gamma\delta$ T cells

Based on the mechanism of  $\gamma\delta$  T cell activation by pAgs, the administration of human PBMCs with pAgs leads to rapid and selective expansion of V $\gamma$ 9V $\delta$ 2 T cells *in vitro* [43]. Furthermore, amino-bisphosphonates (such as Zoledronic acid and pamidronate), by inhibiting farnesyl pyrophosphate synthase and disrupting the mevalonate pathway, result in intracellular accumulation of pAgs, thereby specifically activating V $\gamma$ 9V $\delta$ 2 T cells [8,41]. Additionally, the BTN3A1 monoclonal antibody 20.1 directly binds BTN3A1, inducing a conformational change that facilitates binding with BTN2A1, thus stimulating proliferation of V $\gamma$ 9V $\delta$ 2 T cells in an pAgs-independent manner [44]. Furthermore, in humanized mice infected with influenza A virus, treatment with amino-bisphosphonates improved several protective indicators, including body weight, lung tissue pathology, viral load, and mortality [8]. Of note, amino-bisphosphonates have already been clinically applied in the treatment of Paget's disease [45]. Additionally, the BTN agonist ICT01 has also demonstrated promising clinical efficacy in cancer therapy and is considered safe for human use [46] (Fig 2). Excitingly, due to their HLA-independent, allogeneic V $\gamma$ 9V $\delta$ 2 T-cell therapy—where V $\gamma$ 9V $\delta$ 2 T cells from healthy donors are expanded and infused into patients—has been shown to prolong the survival of cancer patients without causing adverse effects [47]. In the future, patients with acute flavivirus infections may potentially receive pre-expanded V $\gamma$ 9V $\delta$ 2 T cells from healthy donors to control the progress of acute viral infection. Therefore, the therapeutic potential of V $\gamma$ 9V $\delta$ 2 T cells could be rapidly evaluated in mouse models and subsequently advanced to clinical trials for the treatment of flavivirus infections.

In addition to V $\gamma$ 9V $\delta$ 2 T cells, the challenge of expanding V $\delta$ 1 T cells has been successfully addressed, resulting in the development of delta one T (DOT) cells suitable for clinical use [48]. Preclinical studies have demonstrated that DOT cells can effectively suppress cancer progression in xenograft models [49]. Importantly, DOT cells produce abundant IFN- $\gamma$  and TNF- $\alpha$  but do not secrete IL-17A [48]. Notably, IL-17A has been shown to play a protective role in WNV infections but to exacerbate disease severity in DENV infections [33,40]. Therefore, the safety and efficacy of DOT cells need to be further evaluated across different flaviviruses. Overall, given the absence of human clinical trials and the limited research related to flaviviruses, DOT cells should not currently be considered a primary therapeutic option for the treatment of flavivirus infections.

## Bispecific antibody

In HCMV [50], hepatitis B virus (HBV) [51], and HIV [52] infections, there has been preliminary research on T cell-engaging bispecific antibodies (bsAbs). One arm of bispecific antibodies targets viral-specific antigens, while the other arm targets antibody molecules on T cell surfaces (such as CD3, V $\gamma$ 9), thereby directing T cells towards infected cells. However, the efficacy of CD3-targeting bsAbs may be limited since they activate T cells across all lineages [53]. Recruiting  $\gamma\delta$  T cells with defined protective roles (such as V $\gamma$ 9V $\delta$ 2 T cells) to kill infected cells may offer advantages over CD3-based bsAbs. Moreover, V $\gamma$ 9V $\delta$ 2 T cells combined with bsAbs can still be activated by pAgs, further enhancing their cytotoxic functions [54]. Additionally, V $\gamma$ 9-based bsAbs have been tested for phase I clinical trial [54]. Therefore, one arm of the bsAbs designed for the treatment of flavivirus infections could be targeted against the E protein or NS1 protein (Fig 2). The E protein, as a structural component of flaviviruses, is a critical epitope for neutralizing antibodies [55]. Although the NS1 protein, a non-structural component of flaviviruses, is not expressed on the viral surface, it is secreted into the bloodstream during the early stage of infection and is thus commonly used as an early biomarker for flavivirus infections [56]. Furthermore, the antibody structures targeting these

two proteins have already been extensively characterized [57,58], significantly reducing the complexity of bsAbs design. Therefore, this therapeutic approach should be given priority consideration.

### CAR- $\gamma\delta$ T cells

Chimeric antigen receptor (CAR)-T cell therapy has been widely employed in cancer treatment, primarily by genetically modifying  $\alpha\beta$  T cells to introduce receptor genes capable of recognizing tumor-specific antigens, thereby achieving precise targeted killing. However, as a personalized therapy, CAR-T requires extensive preparation and incurs high costs. Allo-geneic transplantation may lead to severe graft-versus-host disease (GVHD) and cytokine release syndrome [59]. In contrast to  $\alpha\beta$  T cells, both NK cells and  $\gamma\delta$  T cells do not require prior sensitization and do not cause GVHD, making them increasingly attractive in CAR-T cell therapy. CAR-NK cells targeting the S protein of SARS-CoV-2 enhanced the production of TNF- $\alpha$  and IFN- $\gamma$  upon binding to viral particles, thereby augmenting cytotoxicity against cells expressing high levels of the spike protein [60]. However, CAR-NK cell therapy faces challenges such as difficulties *in vivo* expansion and low transfection efficiency. Conversely, CAR- $\gamma\delta$  T cell therapy based on V $\gamma$ 9V $\delta$ 2 T cells can overcome the limitations of CAR-T and CAR-NK cells, promising significant application prospects [61]. Furthermore, expanded CAR-V $\gamma$ 9V $\delta$ 2 T cells retain cross-presenting capabilities, enabling direct antigen presentation to  $\alpha\beta$  T cells and enhancing overall immune response against infections [62]. Elevated expression of NKG2D ligands were observed in target cells infected with ZIKV [42]. Therefore, in addition to targeting viral antigens, CAR- $\gamma\delta$  T cells can be engineered to target NKG2D ligands, further enhancing their targeted killing function [63]. In conclusion, the engineering of V $\gamma$ 9V $\delta$ 2 T cells derived from healthy donors, incorporating flaviviruses antigens or NKG2D-CAR, could significantly enhance the targeting capability of V $\gamma$ 9V $\delta$ 2 T cells (Fig 2). However, such approaches should be pursued primarily in scenarios where allogeneic V $\gamma$ 9V $\delta$ 2 T cells therapy fails to achieve sufficient therapeutic efficacy and requires further optimization.

### $\gamma\delta$ TCR-T cells

Traditional TCR-T cell therapy involves screening and identifying  $\alpha\beta$  TCR sequences that specifically bind target antigens. Through genetic engineering, these sequences are transduced into the nuclei of patient's conventional T cells, enabling them to express  $\alpha\beta$  TCR sequences for specific recognition and killing of target cells. In HBV, infusion of HBV-specific CD8<sup>+</sup> V $\beta$ <sup>+</sup> T cells into HBV-related hepatocellular carcinoma patients resulted in decreased or stable levels of HBsAg and HBV DNA in most patients' circulation, highlighting the therapy's significant targeting efficacy [64]. Leveraging the rapid target cell recognition capability of  $\gamma\delta$  TCR involves transducing  $\gamma\delta$  TCR into conventional T cells to enhance their sensitivity to target cells. Furthermore, fusion of  $\gamma\delta$  TCR with T cell stimulatory molecule CD3 and viral antigens further enhances signal transduction and targeting of  $\gamma\delta$  TCR-T cells [65] (Fig 2). Since this approach does not directly utilize V $\gamma$ 9V $\delta$ 2 T cells but leverages the recognition mechanism of the V $\gamma$ 9V $\delta$ 2 TCR to enhance the specificity of  $\alpha\beta$  T cells, it necessitates consideration of MHC restriction, which may lead to the occurrence of GVHD. Therefore, this approach should not currently be considered for the treatment of flavivirus infections.

### Drug-Assisted $\gamma\delta$ T cells

TLR7, as a crucial pattern recognition receptor for flaviviruses, is involved in the activation of  $\gamma\delta$  T cells during WNV infection [37]. TLR7 agonists serve as adjuvants in cancer

immunotherapy clinical trials. Pre-treatment of tumor cells with TLR7 ligands significantly enhances the cytotoxicity of  $\gamma\delta$  T cells [66]. A current phase I clinical study demonstrated that the TLR7 agonist RO7020531 was effective and well-tolerated in patients with chronic hepatitis B [67]. Therefore, TLR7 agonists may hold promise for treating flavivirus infections.

TIM-3, a negative regulator of immune cells, suppresses the Th1 cytokine secretion and cytotoxicity of V $\gamma$ 9V $\delta$ 2 T cells when elevated. Blocking TIM-3 enhances the function of V $\gamma$ 9V $\delta$ 2 T cells [68,69]. Increased expression of the TIM-3 molecule on IFN- $\gamma$ <sup>+</sup>  $\gamma\delta$  T cells was observed in patients with acute dengue fever [27], suggesting that TIM-3 upregulation may impair the anti-infective function of  $\gamma\delta$  T cells, potentially contributing to the manifestation of clinical symptoms. Therefore, anti-TIM-3 therapy may benefit patients infected with DENV.

Vitamin C (VC) is an essential vitamin that plays a crucial role in regulating immune cell functions. A research study indicated that VC reduces apoptosis of  $\gamma\delta$  T cells and increases secretion of Th1 cytokines [70]. In patients infected with ZIKV, high-dose intravenous VC administration alleviated clinical symptoms without adverse effects [71]. However, further clarification is needed regarding the role of  $\gamma\delta$  T cells in this context.

In a mouse model of WNV infection, oral administration of active hexose correlated compound (AHCC) one week before infection, on day 1 and 3 post-infection enhanced mice resistance against lethal doses of WNV. Moreover, an increase in  $\gamma\delta$  T cell numbers and specific IgM and IgG production against WNV was observed [72]. These findings suggest that dietary supplementation with AHCC may enhance  $\gamma\delta$  T cell function, thereby prophylactically boosting host resistance against flaviviruses (Table 3).

### Potential role in vaccine

In addition to their direct anti-infective role,  $\gamma\delta$  T cells function as part of adaptive immunity, undergoing significant expansion and generating memory-like responses during secondary viral infections [6,73], and promoting the formation of adaptive immunity through antigen presentation and cytokine secretion [38,74]. In rhesus macaques, following immunization with YF-17D (a live attenuated YFV vaccine) and recombinant adenovirus type 5 vaccines, an increase in IFN- $\gamma$  was observed only in the YF-17D group. Further data analysis revealed an early increase in the proportion of IFN- $\gamma$ <sup>+</sup>  $\gamma\delta$  T cells, highlighting the significant role of  $\gamma\delta$  T cells in vaccine immunity [75]. Moreover, studies indicated that short-term oral administration of  $\gamma\delta$  T cell modulator AHCC in subjects vaccinated against influenza virus enhanced titers of influenza-specific antibodies and increased the number of CD8<sup>+</sup> T cells [76]. Additionally, a recent study has demonstrated that the measles, mumps, and rubella vaccine can induce  $\gamma\delta$  T cells to develop trained immunity, a phenomenon in which innate immune cells exhibit an enhanced functional response upon re-exposure to pathogens or unrelated stimuli [77]. This effectively leverages the non-MHC-restricted characteristics of  $\gamma\delta$  T cells, thereby broadening the protective spectrum of the vaccine. Consequently, future flavivirus vaccine designs should consider incorporating strategies to activate  $\gamma\delta$  T cells to enhance their efficacy.

In summary, current  $\gamma\delta$  T cell-based immunotherapies predominantly focus on V $\gamma$ 9V $\delta$ 2 T cells due to their well-defined mechanisms of specific activation and expansion, established manufacturing processes, and favorable clinical safety profiles. Therefore, future development of  $\gamma\delta$  T cell immunotherapies for flavivirus infections should prioritize this subset. Among the various methods discussed, amino-bisphosphonates, which are already in clinical use, and the clinically safe BTN agonist ICT01 should be considered as primary candidates for therapeutic trials targeting flavivirus infections. Additionally, immunomodulators such as VC and AHCC could serve as complementary approaches. Furthermore, the design of bispecific antibodies (bsAbs) should integrate flavivirus-specific antigens,

such as the E protein or NS1 protein, with V $\gamma$ 9-targeting antibodies. Moreover, flavivirus vaccine development should explore strategies to specifically activate  $\gamma\delta$  T cells. These two approaches, when rationally designed, could be evaluated in preclinical animal models to assess their efficacy and translational potential.

## Conclusion marks

Overall, the available evidence indicates that  $\gamma\delta$  T cells play a protective role in flavivirus infections. The immunotherapies based on  $\gamma\delta$  T cells can be considered as a potential therapeutic approach for flavivirus infections. However, several key questions remain to be further elucidated: (i) the immune characteristics and roles of various  $\gamma\delta$  T cell subsets (V $\delta$ 1, V $\delta$ 2, V $\delta$ 3) in flavivirus-infected patients. Currently, our focus has been predominantly on the V $\delta$ 2 subset during flavivirus infections. However, the unique recognition patterns of the V $\delta$ 1 subset in viral infections and the significant increase in the proportion of V $\delta$ 1<sup>-</sup> V $\delta$ 2<sup>-</sup> cell subsets in ZIKV-infected patients necessitate investigation into the roles of other  $\gamma\delta$  T cell substructures in flavivirus infections. (ii) The protective mechanism of  $\gamma\delta$  T cells needs to be further explored. For example,  $\gamma\delta$  T cells not only process endogenous antigens to induce activation of CD4<sup>+</sup>  $\alpha\beta$  T cells but also uptake and cross-present soluble antigens to activate CD8<sup>+</sup>  $\alpha\beta$  T cells in HCMV infections [6]. If we can clarify whether  $\gamma\delta$  T cells play this role in flavivirus infections, it may be meaningful for vaccine design and immunotherapy strategies. (iii) The efficacy and safety of  $\gamma\delta$  T cell-based therapies in flavivirus infections. Currently, effective treatments for flaviviruses are lacking. Exploring the safety and efficacy of these therapies in flavivirus infections could alleviate the disease burden. Based on current treatment strategies, we provide a framework for prioritizing therapeutic approaches. Addressing these questions will improve our understanding of the role  $\gamma\delta$  T cells play in flavivirus infections and promote the safe application of  $\gamma\delta$  T cell-based therapeutic strategies in their treatment.

## Key papers

- Pierson TC, Diamond MS. The continued threat of emerging flaviviruses. *Nat Microbiol.* 2020;5(6):796-812. <https://doi.org/10.1038/s41564-020-0714-0> PMID: 32367055 [3].
- Caron J, Ridgley LA, Bodman-Smith M. How to Train Your Dragon: Harnessing Gamma Delta T Cells Antiviral Functions and Trained Immunity in a Pandemic Era. *Front Immunol.* 2021;12:666983. <https://doi.org/10.3389/fimmu.2021.666983> PMID: 33854516 [7].
- Mantri CK, St John AL. Immune synapses between mast cells and  $\gamma\delta$  T cells limit viral infection. *J Clin Invest.* 2019;129(3):1094-108. <https://doi.org/10.1172/JCI122530> PMID: 30561384 [25].
- Cimini E, Grassi G, Beccacece A, Casetti R, Castilletti C, Capobianchi MR, et al. In Acute Dengue Infection, High TIM-3 Expression May Contribute to the Impairment of IFN $\gamma$  Production by Circulating V $\delta$ 2 T Cells. *Viruses.* 2022;14(1). <https://doi.org/10.3390/v14010130> PMID: 35062334 [27].
- Wang T, Gao Y, Scully E, Davis CT, Anderson JF, Welte T, et al. Gamma delta T cells facilitate adaptive immunity against West Nile virus infection in mice. *J Immunol.* 2006;177(3):1825-32. <https://doi.org/10.4049/jimmunol.177.3.1825> PMID: 16849493 [35].

## Learning points

- Due to the acute onset of flavivirus infections and the lack of rapid adaptive immune responses, the innate immune system, particularly  $\gamma\delta$  T cells, plays a helpful role in early defense mechanisms.
- $\gamma\delta$  T cells are a major component of the innate immune system and can rapidly respond to infections by exhibiting cytotoxic activity and secreting antiviral cytokines. During flavivirus infections, their numbers and functions undergo changes.
- In the context of the lack of flavivirus treatment, the potential application of  $\gamma\delta$  T cells-based therapies could be considered into flavivirus treatment, hoping to give some suggestions for the exploration of new therapeutic strategies.

## Author contributions

**Conceptualization:** Ran Wang.

**Formal analysis:** Qi Li, Meng Zhang.

**Investigation:** Qi Li, Meng Zhang.

**Project administration:** Ran Wang.

**Supervision:** Kevin C. Kain, Ran Wang.

**Visualization:** Qi Li, Meng Zhang.

**Writing – original draft:** Qi Li, Meng Zhang, Bridget Kim, Samuel Soriano, Hridesh Mishra, Ran Wang.

**Writing – review & editing:** Qiuyue Wang, Kevin C. Kain, Ran Wang.

## References

1. Wang X, Usama A, Huanchun C, Cao S, Ye J. Biological determinants perpetuating the transmission dynamics of mosquito-borne flaviviruses. *Emerg Microbes Infect.* 2023;12(2):2212812. <https://doi.org/10.1080/22221751.2023.2212812> PMID: [37158598](https://pubmed.ncbi.nlm.nih.gov/37158598/)
2. Bhatt S, Gething PW, Brady OJ, Messina JP, Farlow AW, Moyes CL, et al. The global distribution and burden of dengue. *Nature.* 2013;496(7446):504–7. <https://doi.org/10.1038/nature12060> PMID: [23563266](https://pubmed.ncbi.nlm.nih.gov/23563266/)
3. Pierson TC, Diamond MS. The continued threat of emerging flaviviruses. *Nat Microbiol.* 2020;5(6):796–812. <https://doi.org/10.1038/s41564-020-0714-0> PMID: [32367055](https://pubmed.ncbi.nlm.nih.gov/32367055/)
4. Chong HY, Leow CY, Abdul Majeed AB, Leow CH. Flavivirus infection-A review of immunopathogenesis, immunological response, and immunodiagnosis. *Virus Res.* 2019;274:197770. <https://doi.org/10.1016/j.virusres.2019.197770> PMID: [31626874](https://pubmed.ncbi.nlm.nih.gov/31626874/)
5. Willcox CR, Davey MS, Willcox BE. Development and selection of the human V $\gamma$ 9V $\delta$ 2+ T-cell repertoire. *Front Immunol.* 2018;9:1501. <https://doi.org/10.3389/fimmu.2018.01501> PMID: [30013562](https://pubmed.ncbi.nlm.nih.gov/30013562/)
6. Deseke M, Rampoldi F, Sandrock I, Borst E, Böning H, Ssebyatika GL, et al. A CMV-induced adaptive human V $\delta$ 1+  $\gamma\delta$  T cell clone recognizes HLA-DR. *J Exp Med.* 2022;219(9):e20212525. <https://doi.org/10.1084/jem.20212525> PMID: [35852466](https://pubmed.ncbi.nlm.nih.gov/35852466/)
7. Caron J, Ridgley LA, Bodman-Smith M. How to train your dragon: harnessing gamma delta T cells antiviral functions and trained immunity in a pandemic era. *Front Immunol.* 2021;12:666983. <https://doi.org/10.3389/fimmu.2021.666983> PMID: [33854516](https://pubmed.ncbi.nlm.nih.gov/33854516/)
8. Tu W, Zheng J, Liu Y, Sia SF, Liu M, Qin G, et al. The aminobisphosphonate pamidronate controls influenza pathogenesis by expanding a gammadelta T cell population in humanized mice. *J Exp Med.* 2011;208(7):1511–22. <https://doi.org/10.1084/jem.20110226> PMID: [21708931](https://pubmed.ncbi.nlm.nih.gov/21708931/)
9. Mensurado S, Blanco-Domínguez R, Silva-Santos B. The emerging roles of  $\gamma\delta$  T cells in cancer immunotherapy. *Nat Rev Clin Oncol.* 2023;20(3):178–91. <https://doi.org/10.1038/s41571-022-00722-1> PMID: [36624304](https://pubmed.ncbi.nlm.nih.gov/36624304/)

10. Komarasamy TV, Adnan NAA, James W, Balasubramaniam VR. Finding a chink in the armor: update, limitations, and challenges toward successful antivirals against flaviviruses. *PLoS Negl Trop Dis*. 2022;16(4):e0010291. <https://doi.org/10.1371/journal.pntd.0010291> PMID: [35482672](https://pubmed.ncbi.nlm.nih.gov/35482672/)
11. Papadopoulou M, Sanchez Sanchez G, Vermijlen D. Innate and adaptive  $\gamma\delta$  T cells: how, when, and why. *Immunol Rev*. 2020;298(1):99–116. <https://doi.org/10.1111/imr.12926> PMID: [33146423](https://pubmed.ncbi.nlm.nih.gov/33146423/)
12. Yuan L, Ma X, Yang Y, Qu Y, Li X, Zhu X, et al. Phosphoantigens glue butyrophilin 3A1 and 2A1 to activate V $\gamma$ 9V $\delta$ 2 T cells. *Nature*. 2023;621(7980):840–8. <https://doi.org/10.1038/s41586-023-06525-3> PMID: [37674084](https://pubmed.ncbi.nlm.nih.gov/37674084/)
13. Xiang Z, Liu Y, Zheng J, Liu M, Lv A, Gao Y, et al. Targeted activation of human V $\gamma$ 9V $\delta$ 2-T cells controls Epstein-Barr virus-induced B cell lymphoproliferative disease. *Cancer Cell*. 2014;26(4):565–76. <https://doi.org/10.1016/j.ccr.2014.07.026> PMID: [25220446](https://pubmed.ncbi.nlm.nih.gov/25220446/)
14. Angelini DF, Borsellino G, Poupot M, Diamantini A, Poupot R, Bernardi G, et al. Fc $\gamma$ RIII discriminates between 2 subsets of V $\gamma$ 9V $\delta$ 2 effector cells with different responses and activation pathways. *Blood*. 2004;104(6):1801–7. <https://doi.org/10.1182/blood-2004-01-0331> PMID: [15178578](https://pubmed.ncbi.nlm.nih.gov/15178578/)
15. Siegers GM, Lamb LS Jr. Cytotoxic and regulatory properties of circulating V $\delta$ 1+ $\gamma\delta$  T cells: a new player on the cell therapy field?. *Mol Ther*. 2014;22(8):1416–22. <https://doi.org/10.1038/mt.2014.104> PMID: [24895997](https://pubmed.ncbi.nlm.nih.gov/24895997/)
16. Sok CL, Rossjohn J, Gully BS. The evolving portrait of  $\gamma\delta$  TCR recognition determinants. *J Immunol*. 2024;213(5):543–52. <https://doi.org/10.4049/jimmunol.2400114> PMID: [39159405](https://pubmed.ncbi.nlm.nih.gov/39159405/)
17. Kabelitz D. Delta one T cells recognize AML via DNAM-1. *Blood*. 2024;143(15):1434–6. <https://doi.org/10.1182/blood.2024024120> PMID: [38602695](https://pubmed.ncbi.nlm.nih.gov/38602695/)
18. Knight A, Madrigal AJ, Grace S, Sivakumaran J, Kottaridis P, Mackinnon S, et al. The role of V $\delta$ 2-negative  $\gamma\delta$  T cells during cytomegalovirus reactivation in recipients of allogeneic stem cell transplantation. *Blood*. 2010;116(12):2164–72. <https://doi.org/10.1182/blood-2010-01-255166> PMID: [20576814](https://pubmed.ncbi.nlm.nih.gov/20576814/)
19. Rice MT, von Borstel A, Chevour P, Awad W, Howson LJ, Littler DR, et al. Recognition of the antigen-presenting molecule MR1 by a V $\delta$ 3+  $\gamma\delta$  T cell receptor. *Proc Natl Acad Sci U S A*. 2021;118(49):e2110288118. <https://doi.org/10.1073/pnas.2110288118> PMID: [34845016](https://pubmed.ncbi.nlm.nih.gov/34845016/)
20. Uldrich AP, Le Nours J, Pellicci DG, Gherardin NA, McPherson KG, Lim RT, et al. CD1d-lipid antigen recognition by the  $\gamma\delta$  TCR. *Nat Immunol*. 2013;14(11):1137–45. <https://doi.org/10.1038/ni.2713> PMID: [24076636](https://pubmed.ncbi.nlm.nih.gov/24076636/)
21. Marlin R, Pappalardo A, Kaminski H, Willcox CR, Pitard V, Netzer S, et al. Sensing of cell stress by human  $\gamma\delta$  TCR-dependent recognition of annexin A2. *Proc Natl Acad Sci U S A*. 2017;114(12):3163–8. <https://doi.org/10.1073/pnas.1621052114> PMID: [28270598](https://pubmed.ncbi.nlm.nih.gov/28270598/)
22. Qu G, Wang S, Zhou Z, Jiang D, Liao A, Luo J. Comparing mouse and human tissue-resident  $\gamma\delta$  T cells. *Front Immunol*. 2022;13:891687. <https://doi.org/10.3389/fimmu.2022.891687> PMID: [35757696](https://pubmed.ncbi.nlm.nih.gov/35757696/)
23. Cruz MS, Diamond A, Russell A, Jameson JM. Human  $\alpha\beta$  and  $\gamma\delta$  T cells in skin immunity and disease. *Front Immunol*. 2018;9:1304. <https://doi.org/10.3389/fimmu.2018.01304> PMID: [29928283](https://pubmed.ncbi.nlm.nih.gov/29928283/)
24. Dieudé M, Striegl H, Tyznik AJ, Wang J, Behar SM, Piccirillo CA, et al. Cardiolipin binds to CD1d and stimulates CD1d-restricted  $\gamma\delta$  T cells in the normal murine repertoire. *J Immunol*. 2011;186(8):4771–81. <https://doi.org/10.4049/jimmunol.1000921> PMID: [21389252](https://pubmed.ncbi.nlm.nih.gov/21389252/)
25. Mantri CK, St John AL. Immune synapses between mast cells and  $\gamma\delta$  T cells limit viral infection. *J Clin Invest*. 2019;129(3):1094–108. <https://doi.org/10.1172/JCI122530> PMID: [30561384](https://pubmed.ncbi.nlm.nih.gov/30561384/)
26. Wang T, Scully E, Yin Z, Kim JH, Wang S, Yan J, et al. IFN- $\gamma$ -producing gamma delta T cells help control murine West Nile virus infection. *J Immunol*. 2003;171(5):2524–31. <https://doi.org/10.4049/jimmunol.171.5.2524> PMID: [12928402](https://pubmed.ncbi.nlm.nih.gov/12928402/)
27. Cimini E, Grassi G, Beccacece A, Casetti R, Castilletti C, Capobianchi MR, et al. In acute dengue infection, high TIM-3 expression may contribute to the impairment of IFN $\gamma$  production by circulating V $\delta$ 2 T cells. *Viruses*. 2022;14(1):130. <https://doi.org/10.3390/v14010130> PMID: [35062334](https://pubmed.ncbi.nlm.nih.gov/35062334/)
28. Cimini E, Castilletti C, Sacchi A, Casetti R, Bordoni V, Romanelli A, et al. Human Zika infection induces a reduction of IFN- $\gamma$  producing CD4 T-cells and a parallel expansion of effector V $\delta$ 2 T-cells. *Sci Rep*. 2017;7(1):6313. <https://doi.org/10.1038/s41598-017-06536-x> PMID: [28740159](https://pubmed.ncbi.nlm.nih.gov/28740159/)
29. Antoniou E, Andronikidi PE, Eskitzis P, Iliadou M, Palaska E, Tzitiroidou-Chatzopoulou M, et al. Congenital Zika syndrome and disabilities of feeding and breastfeeding in early childhood: a systematic review. *Viruses*. 2023;15(3):601. <https://doi.org/10.3390/v15030601> PMID: [36992310](https://pubmed.ncbi.nlm.nih.gov/36992310/)
30. Moström MJ, Scheef EA, Sprehe LM, Szeltner D, Tran D, Hennebold JD, et al. Immune profile of the normal maternal-fetal interface in rhesus macaques and its alteration following Zika virus infection. *Front Immunol*. 2021;12:719810. <https://doi.org/10.3389/fimmu.2021.719810> PMID: [34394129](https://pubmed.ncbi.nlm.nih.gov/34394129/)

31. Guabiraba R, Besnard A-G, Marques RE, Maillet I, Fagundes CT, Conceição TM, et al. IL-22 modulates IL-17A production and controls inflammation and tissue damage in experimental dengue infection. *Eur J Immunol*. 2013;43(6):1529–44. <https://doi.org/10.1002/eji.201243229> PMID: [23505056](https://pubmed.ncbi.nlm.nih.gov/23505056/)
32. Liang Y, Yi P, Ru W, Jie Z, Wang H, Ghanayem T, et al. IL-22 hinders antiviral T cell responses and exacerbates ZIKV encephalitis in immunocompetent neonatal mice. *J Neuroinflammation*. 2020;17(1):249. <https://doi.org/10.1186/s12974-020-01928-9> PMID: [32843067](https://pubmed.ncbi.nlm.nih.gov/32843067/)
33. Sánchez-Vargas LA, Hernández-Flores KG, Thomas-Dupont P, Izaguirre-Hernández IY, Sánchez-Marce EE, Remes-Ruiz R, et al. Characterization of the IL-17 and CD4+ Th17 cells in the clinical course of dengue virus infections. *Viruses*. 2020;12(12):1435. <https://doi.org/10.3390/v12121435> PMID: [33322218](https://pubmed.ncbi.nlm.nih.gov/33322218/)
34. Mills KHG. IL-17 and IL-17-producing cells in protection versus pathology. *Nat Rev Immunol*. 2023;23(1):38–54. <https://doi.org/10.1038/s41577-022-00746-9> PMID: [35790881](https://pubmed.ncbi.nlm.nih.gov/35790881/)
35. Wang T, Gao Y, Scully E, Davis CT, Anderson JF, Welte T, et al. Gamma delta T cells facilitate adaptive immunity against West Nile virus infection in mice. *J Immunol*. 2006;177(3):1825–32. <https://doi.org/10.4049/jimmunol.177.3.1825> PMID: [16849493](https://pubmed.ncbi.nlm.nih.gov/16849493/)
36. Welte T, Lamb J, Anderson JF, Born WK, O'Brien RL, Wang T. Role of two distinct gammadelta T cell subsets during West Nile virus infection. *FEMS Immunol Med Microbiol*. 2008;53(2):275–83. <https://doi.org/10.1111/j.1574-695X.2008.00430.x> PMID: [18513355](https://pubmed.ncbi.nlm.nih.gov/18513355/)
37. Zhang J, Wang J, Pang L, Xie G, Welte T, Saxena V, et al. The co-stimulatory effects of MyD88-dependent Toll-like receptor signaling on activation of murine  $\gamma\delta$  T cells. *PLoS One*. 2014;9(9):e108156. <https://doi.org/10.1371/journal.pone.0108156> PMID: [25232836](https://pubmed.ncbi.nlm.nih.gov/25232836/)
38. Fang H, Welte T, Zheng X, Chang G-JJ, Holbrook MR, Soong L, et al. gammadelta T cells promote the maturation of dendritic cells during West Nile virus infection. *FEMS Immunol Med Microbiol*. 2010;59(1):71–80. <https://doi.org/10.1111/j.1574-695X.2010.00663.x> PMID: [20337718](https://pubmed.ncbi.nlm.nih.gov/20337718/)
39. Jain N, Oswal N, Chawla AS, Agrawal T, Biswas M, Vrati S, et al. CD8 T cells protect adult naive mice from JEV-induced morbidity via lytic function. *PLoS Negl Trop Dis*. 2017;11(2):e0005329. <https://doi.org/10.1371/journal.pntd.0005329> PMID: [28151989](https://pubmed.ncbi.nlm.nih.gov/28151989/)
40. Acharya D, Wang P, Paul AM, Dai J, Gate D, Lowery JE, et al. Interleukin-17A promotes CD8+ T cell cytotoxicity to facilitate West Nile virus clearance. *J Virol*. 2016;91(1):e01529-16. <https://doi.org/10.1128/JVI.01529-16> PMID: [27795421](https://pubmed.ncbi.nlm.nih.gov/27795421/)
41. Agrati C, Castilletti C, Cimini E, Romanelli A, Lapa D, Quartu S, et al. Antiviral activity of human V $\delta$ 2 T-cells against WNV includes both cytolytic and non-cytolytic mechanisms. *New Microbiol*. 2016;39(2):139–42. PMID: [27196553](https://pubmed.ncbi.nlm.nih.gov/27196553/)
42. Cimini E, Sacchi A, De Minicis S, Bordoni V, Casetti R, Grassi G, et al. V $\delta$ 2 T-cells Kill ZIKV-infected cells by NKG2D-mediated cytotoxicity. *Microorganisms*. 2019;7(9):350. <https://doi.org/10.3390/microorganisms7090350> PMID: [31547470](https://pubmed.ncbi.nlm.nih.gov/31547470/)
43. Wang R-N, Wen Q, He W-T, Yang J-H, Zhou C-Y, Xiong W-J, et al. Optimized protocols for  $\gamma\delta$  T cell expansion and lentiviral transduction. *Mol Med Rep*. 2019;19(3):1471–80. <https://doi.org/10.3892/mmr.2019.9831> PMID: [30628681](https://pubmed.ncbi.nlm.nih.gov/30628681/)
44. Vavassori S, Kumar A, Wan GS, Ramanjaneyulu GS, Cavallari M, El Daker S, et al. Butyrophilin 3A1 binds phosphorylated antigens and stimulates human  $\gamma\delta$  T cells. *Nat Immunol*. 2013;14(9):908–16. <https://doi.org/10.1038/ni.2665> PMID: [23872678](https://pubmed.ncbi.nlm.nih.gov/23872678/)
45. Choi YJ, Sohn YB, Chung Y-S. Updates on Paget's disease of bone. *Endocrinol Metab (Seoul)*. 2022;37(5):732–43. <https://doi.org/10.3803/EnM.2022.1575> PMID: [36327984](https://pubmed.ncbi.nlm.nih.gov/36327984/)
46. De Gassart A, Le K-S, Brune P, Agaogué S, Sims J, Goubard A, et al. Development of ICT01, a first-in-class, anti-BTN3A antibody for activating V $\gamma$ 9V $\delta$ 2 T cell-mediated antitumor immune response. *Sci Transl Med*. 2021;13(616):eabj0835. <https://doi.org/10.1126/scitranslmed.abj0835> PMID: [34669444](https://pubmed.ncbi.nlm.nih.gov/34669444/)
47. Xu Y, Xiang Z, Alnaggar M, Kouakanou L, Li J, He J, et al. Allogeneic V $\gamma$ 9V $\delta$ 2 T-cell immunotherapy exhibits promising clinical safety and prolongs the survival of patients with late-stage lung or liver cancer. *Cell Mol Immunol*. 2021;18(2):427–39. <https://doi.org/10.1038/s41423-020-0515-7> PMID: [32939032](https://pubmed.ncbi.nlm.nih.gov/32939032/)
48. Almeida AR, Correia DV, Fernandes-Platzgummer A, da Silva CL, da Silva MG, Anjos DR, et al. Delta one T cells for immunotherapy of chronic lymphocytic leukemia: clinical-grade expansion/differentiation and preclinical proof of concept. *Clin Cancer Res*. 2016;22(23):5795–804. <https://doi.org/10.1158/1078-0432.CCR-16-0597> PMID: [27307596](https://pubmed.ncbi.nlm.nih.gov/27307596/)
49. Di Lorenzo B, Simões AE, Caiado F, Tieppo P, Correia DV, Carvalho T, et al. Broad cytotoxic targeting of acute myeloid leukemia by polyclonal delta one T cells. *Cancer Immunol Res*. 2019;7(4):552–8. <https://doi.org/10.1158/2326-6066.CIR-18-0647> PMID: [30894378](https://pubmed.ncbi.nlm.nih.gov/30894378/)

50. Meng W, Tang A, Ye X, Gui X, Li L, Fan X, et al. Targeting human-cytomegalovirus-infected cells by redirecting T cells using an anti-CD3/anti-glycoprotein B bispecific antibody. *Antimicrob Agents Chemother*. 2017;62(1):e01719-17. <https://doi.org/10.1128/AAC.01719-17> PMID: 29038280
51. Kruse RL, Shum T, Legras X, Barzi M, Pankowicz FP, Gottschalk S, et al. In situ liver expression of HBsAg/CD3-bispecific antibodies for HBV immunotherapy. *Mol Ther Methods Clin Dev*. 2017;7:32–41. <https://doi.org/10.1016/j.omtm.2017.08.006> PMID: 29018834
52. Fabozzi G, Pegu A, Koup RA, Petrovas C. Bispecific antibodies: potential immunotherapies for HIV treatment. *Methods*. 2019;154:118–24. <https://doi.org/10.1016/j.ymeth.2018.10.010> PMID: 30352254
53. Labrijn AF, Janmaat ML, Reichert JM, Parren PWHI. Bispecific antibodies: a mechanistic review of the pipeline. *Nat Rev Drug Discov*. 2019;18(8):585–608. <https://doi.org/10.1038/s41573-019-0028-1> PMID: 31175342
54. de Weerd I, Lameris R, Ruben JM, de Boer R, Kloosterman J, King LA, et al. A bispecific single-domain antibody boosts autologous V $\gamma$ 9V $\delta$ 2-T cell responses toward CD1d in chronic lymphocytic leukemia. *Clin Cancer Res*. 2021;27(6):1744–55. <https://doi.org/10.1158/1078-0432.CCR-20-4576> PMID: 33451981
55. Hu T, Wu Z, Wu S, Chen S, Cheng A. The key amino acids of E protein involved in early flavivirus infection: viral entry. *Virology*. 2021;18(1):136. <https://doi.org/10.1186/s12985-021-01611-2> PMID: 34217298
56. Fisher R, Lustig Y, Sklan EH, Schwartz E. The role of NS1 protein in the diagnosis of flavivirus infections. *Viruses*. 2023;15(2):572. <https://doi.org/10.3390/v15020572> PMID: 36851784
57. Deng Y-Q, Dai J-X, Ji G-H, Jiang T, Wang H-J, Yang H, et al. A broadly flavivirus cross-neutralizing monoclonal antibody that recognizes a novel epitope within the fusion loop of E protein. *PLoS One*. 2011;6(1):e16059. <https://doi.org/10.1371/journal.pone.0016059> PMID: 21264311
58. Modhiran N, Song H, Liu L, Bletchly C, Brillault L, Amarilla AA, et al. A broadly protective antibody that targets the flavivirus NS1 protein. *Science*. 2021;371(6525):190–4. <https://doi.org/10.1126/science.abb9425> PMID: 33414219
59. Depil S, Duchateau P, Grupp SA, Mufti G, Poirot L. “Off-the-shelf” allogeneic CAR T cells: development and challenges. *Nat Rev Drug Discov*. 2020;19(3):185–99. <https://doi.org/10.1038/s41573-019-0051-2> PMID: 31900462
60. Lu T, Ma R, Dong W, Teng K-Y, Kollath DS, Li Z, et al. Off-the-shelf CAR natural killer cells secreting IL-15 target spike in treating COVID-19. *Nat Commun*. 2022;13(1):2576. <https://doi.org/10.1038/s41467-022-30216-8> PMID: 35546150
61. Zhai X, You F, Xiang S, Jiang L, Chen D, Li Y, et al. MUC1-Tn-targeting chimeric antigen receptor-modified V $\gamma$ 9V $\delta$ 2 T cells with enhanced antigen-specific anti-tumor activity. *Am J Cancer Res*. 2021;11(1):79–91. PMID: 33520361
62. Capsomidis A, Benthall G, Van Acker HH, Fisher J, Kramer AM, Abeln Z, et al. Chimeric antigen receptor-engineered human gamma delta T cells: enhanced cytotoxicity with retention of cross presentation. *Mol Ther*. 2018;26(2):354–65. <https://doi.org/10.1016/j.ymthe.2017.12.001> PMID: 29310916
63. Ang WX, Ng YY, Xiao L, Chen C, Li Z, Chi Z, et al. Electroporation of NKG2D RNA CAR Improves V $\gamma$ 9V $\delta$ 2 T cell responses against human solid tumor xenografts. *Mol Ther Oncolytics*. 2020;17:421–30. <https://doi.org/10.1016/j.omto.2020.04.013> PMID: 32462079.
64. Meng F, Zhao J, Tan AT, Hu W, Wang S-Y, Jin J, et al. Immunotherapy of HBV-related advanced hepatocellular carcinoma with short-term HBV-specific TCR expressed T cells: results of dose escalation, phase I trial. *Hepatol Int*. 2021;15(6):1402–12. <https://doi.org/10.1007/s12072-021-10250-2> PMID: 34850325
65. Xu Y, Yang Z, Horan LH, Zhang P, Liu L, Zimdahl B, et al. A novel antibody-TCR (AbTCR) platform combines Fab-based antigen recognition with gamma/delta-TCR signaling to facilitate T-cell cytotoxicity with low cytokine release. *Cell Discov*. 2018;4:62. <https://doi.org/10.1038/s41421-018-0066-6> PMID: 30479831
66. Shojaei H, Oberg H-H, Juricke M, Marischen L, Kunz M, Mundhenke C, et al. Toll-like receptors 3 and 7 agonists enhance tumor cell lysis by human gammadelta T cells. *Cancer Res*. 2009;69(22):8710–7. <https://doi.org/10.1158/0008-5472.CAN-09-1602> PMID: 19887600
67. Yuen M-F, Balabanska R, Cottreel E, Chen E, Duan D, Jiang Q, et al. TLR7 agonist RO7020531 versus placebo in healthy volunteers and patients with chronic hepatitis B virus infection: a randomised, observer-blind, placebo-controlled, phase 1 trial. *Lancet Infect Dis*. 2023;23(4):496–507. [https://doi.org/10.1016/S1473-3099\(22\)00727-7](https://doi.org/10.1016/S1473-3099(22)00727-7) PMID: 36509100

68. Wu K, Feng J, Xiu Y, Li Z, Lin Z, Zhao H, et al. V $\delta$ 2 T cell subsets, defined by PD-1 and TIM-3 expression, present varied cytokine responses in acute myeloid leukemia patients. *Int Immunopharmacol*. 2020;80:106122. <https://doi.org/10.1016/j.intimp.2019.106122> PMID: [31955066](https://pubmed.ncbi.nlm.nih.gov/31955066/)
69. Li X, Lu H, Gu Y, Zhang X, Zhang G, Shi T, et al. Tim-3 suppresses the killing effect of V $\gamma$ 9V $\delta$ 2 T cells on colon cancer cells by reducing perforin and granzyme B expression. *Exp Cell Res*. 2020;386(1):111719. <https://doi.org/10.1016/j.yexcr.2019.111719> PMID: [31726050](https://pubmed.ncbi.nlm.nih.gov/31726050/)
70. Kouakanou L, Xu Y, Peters C, He J, Wu Y, Yin Z, et al. Vitamin C promotes the proliferation and effector functions of human  $\gamma\delta$  T cells. *Cell Mol Immunol*. 2020;17(5):462–73. <https://doi.org/10.1038/s41423-019-0247-8> PMID: [31171862](https://pubmed.ncbi.nlm.nih.gov/31171862/)
71. Gonzalez MJ, Berdiel MJ, Miranda-Massari JR, Duconge J, Rodríguez-López JL, Adrover-López PA. High dose intravenous vitamin C treatment for Zika fever. *J Orthomol Med*. 2016;31(1):19–22. PMID: [36177383](https://pubmed.ncbi.nlm.nih.gov/36177383/)
72. Wang S, Welte T, Fang H, Chang G-JJ, Born WK, O'Brien RL, et al. Oral administration of active hexose correlated compound enhances host resistance to West Nile encephalitis in mice. *J Nutr*. 2009;139(3):598–602. <https://doi.org/10.3945/jn.108.100297> PMID: [19141700](https://pubmed.ncbi.nlm.nih.gov/19141700/)
73. Ravens S, Schultze-Florey C, Raha S, Sandrock I, Drenker M, Oberdörfer L, et al. Human  $\gamma\delta$  T cells are quickly reconstituted after stem-cell transplantation and show adaptive clonal expansion in response to viral infection. *Nat Immunol*. 2017;18(4):393–401. <https://doi.org/10.1038/ni.3686> PMID: [28218745](https://pubmed.ncbi.nlm.nih.gov/28218745/)
74. Brandes M, Willimann K, Moser B. Professional antigen-presentation function by human gammadelta T Cells. *Science*. 2005;309(5732):264–8. <https://doi.org/10.1126/science.1110267> PMID: [15933162](https://pubmed.ncbi.nlm.nih.gov/15933162/)
75. Neves PCC, Rudersdorf RA, Galler R, Bonaldo MC, de Santana MGV, Mudd PA, et al. CD8+ gamma-delta TCR+ and CD4+ T cells produce IFN- $\gamma$  at 5-7 days after yellow fever vaccination in Indian rhesus macaques, before the induction of classical antigen-specific T cell responses. *Vaccine*. 2010;28(51):8183–8. <https://doi.org/10.1016/j.vaccine.2010.09.090> PMID: [20939995](https://pubmed.ncbi.nlm.nih.gov/20939995/)
76. Roman BE, Beli E, Duriancik DM, Gardner EM. Short-term supplementation with active hexose correlated compound improves the antibody response to influenza B vaccine. *Nutr Res*. 2013;33(1):12–7. <https://doi.org/10.1016/j.nutres.2012.11.001> PMID: [23351405](https://pubmed.ncbi.nlm.nih.gov/23351405/)
77. Förling RJ, Debisarun PA, Botey-Bataller J, Suen TK, Bulut Ö, Kilic G, et al. MMR vaccination induces trained immunity via functional and metabolic reprogramming of  $\gamma\delta$  T cells. *J Clin Invest*. 2024;134(7):e170848. <https://doi.org/10.1172/JCI170848> PMID: [38290093](https://pubmed.ncbi.nlm.nih.gov/38290093/)
